# Supplementary material for: Size of the Ovulatory Follicle Dictates Spatial Differences in the Oviductal Transcriptome in Cattle
Source: PubMed Central journal article supplement (PMC4689418; doi:10.1371/journal.pone.0145321), 2015-12-23

**S1 Fig: Localization of PGR in the bovine oviduct by immunohistochemistry.** Images of PGR immunohistochemical localization in the ampulla and the isthmus of LF/LCL and SF/SCL animals at Day 4 of the estrus cycle. In each column, ampulla and isthmus samples from individual animals of the LF-LCL and SF-SCL groups are shown. Original magnification 20x, Scale bar 100  $\mu$ m (n=5 per group).

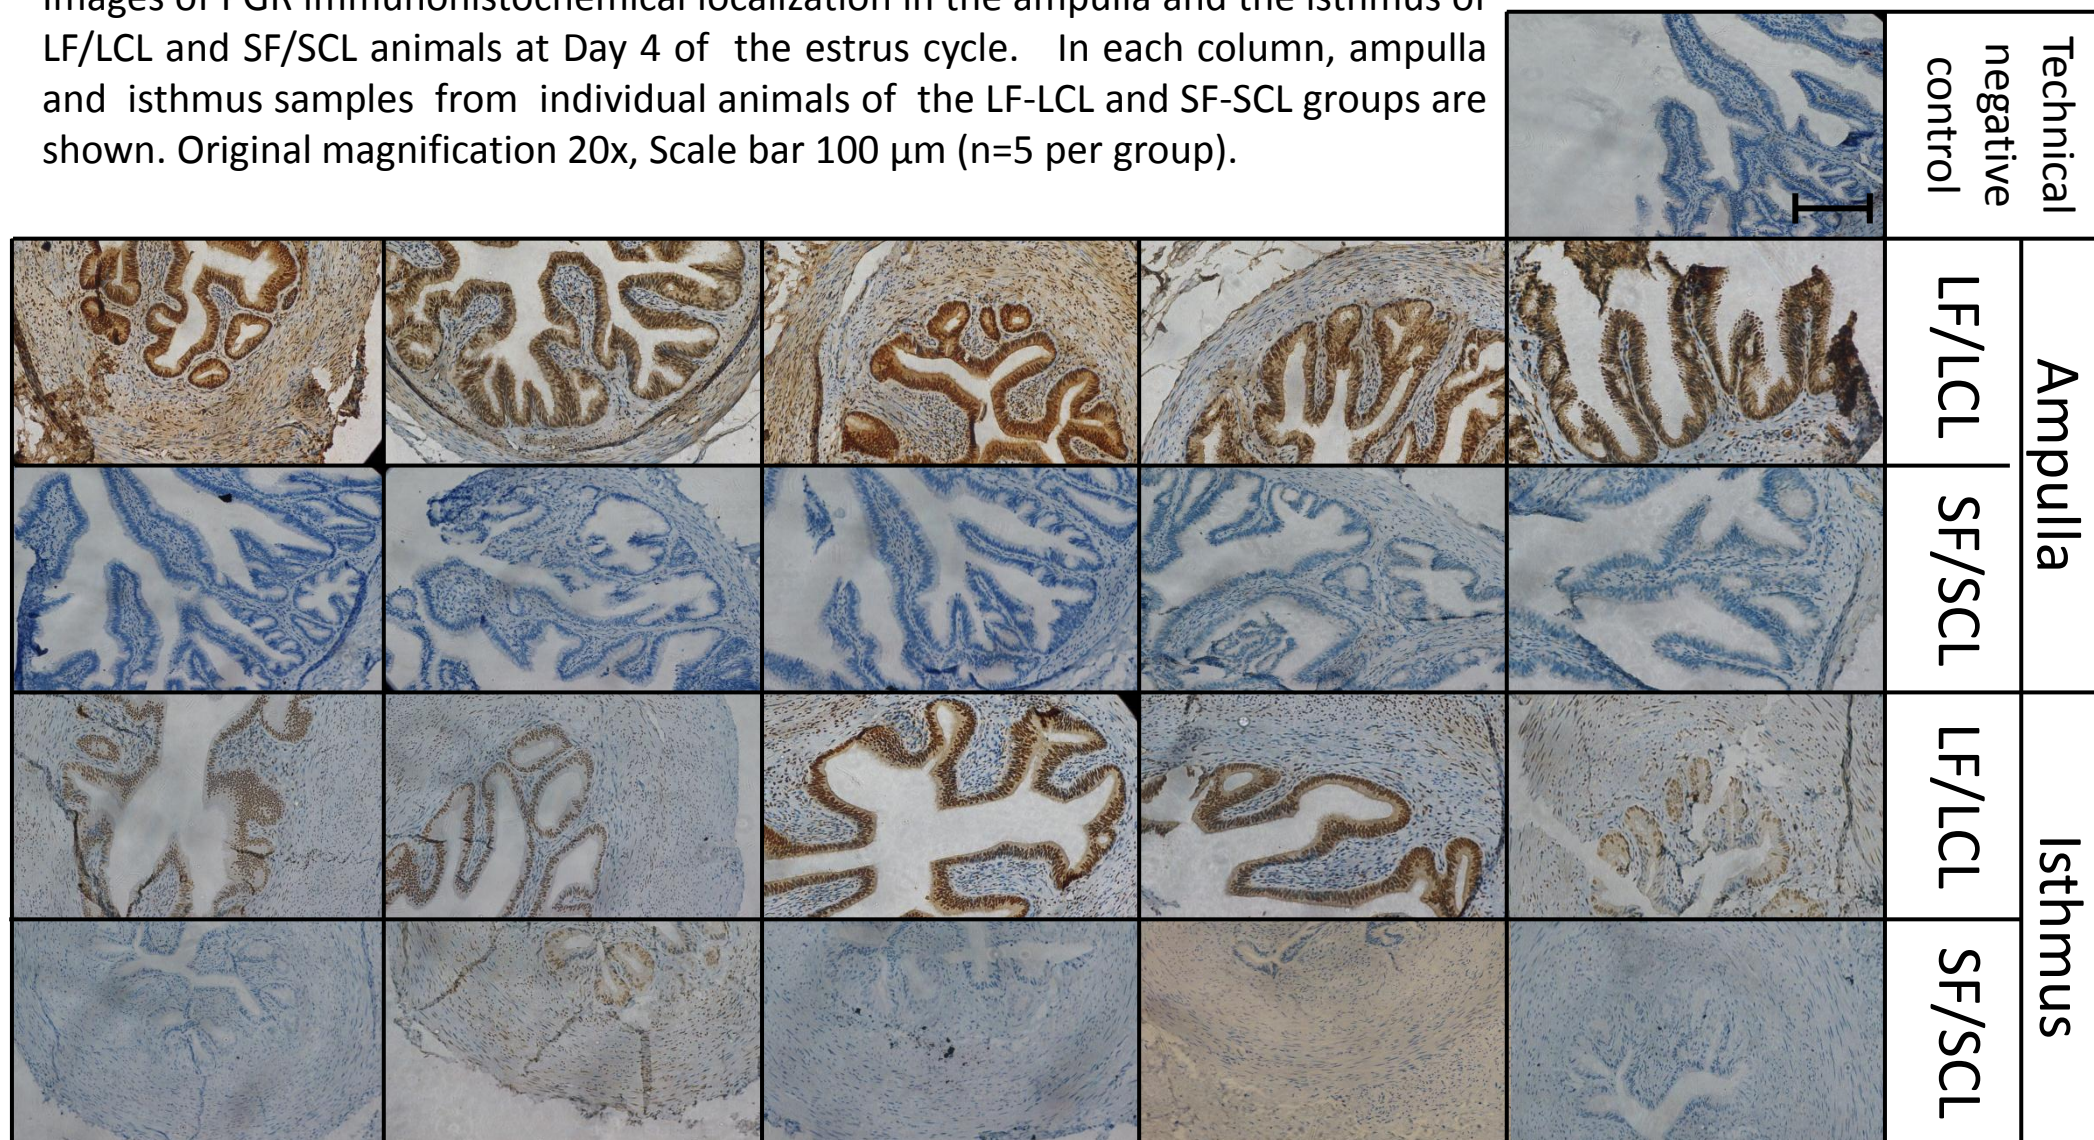

Supplement: pone.0145321.s001.pdf [file pone.0145321.s001.pdf]
