# Supplementary material for: Size of the Ovulatory Follicle Dictates Spatial Differences in the Oviductal Transcriptome in Cattle
Source: PubMed Central journal article supplement (PMC4689418; doi:10.1371/journal.pone.0145321), 2015-12-23
Supplement: pone.0145321.s002.pdf [file pone.0145321.s002.pdf]

**S2 Figure: Localization of ERalpha in the bovine oviduct by immunohistochemistry.** Images of ERalpha immunohistochemical localization in the ampulla and the isthmus of LF/LCL and SF/SCL animals at Day 4 of the estrus cycle. In each column, ampulla and isthmus samples from individual animals of the LF-LCL and SF-SCL groups are shown. Original magnification 20x, Scale bar 100  $\mu$ m (n=5 per group).

| Technical negative control                                                          | Ampulla                                                                             |                                                                                     |                                                                                      |                                                                                       | Isthmus                                                                             |                                                                                     |                                                                                     |                                                                                      |                                                                                       |                                                                                    |                                                                                    |                                                                                    |                                                                                     |                                                                                      |                                                                                   |                                                                                   |                                                                                   |                                                                                    |                                                                                     |                                                                                  |                                                                                  |                                                                                  |                                                                                   |                                                                                    |
|-------------------------------------------------------------------------------------|-------------------------------------------------------------------------------------|-------------------------------------------------------------------------------------|--------------------------------------------------------------------------------------|---------------------------------------------------------------------------------------|-------------------------------------------------------------------------------------|-------------------------------------------------------------------------------------|-------------------------------------------------------------------------------------|--------------------------------------------------------------------------------------|---------------------------------------------------------------------------------------|------------------------------------------------------------------------------------|------------------------------------------------------------------------------------|------------------------------------------------------------------------------------|-------------------------------------------------------------------------------------|--------------------------------------------------------------------------------------|-----------------------------------------------------------------------------------|-----------------------------------------------------------------------------------|-----------------------------------------------------------------------------------|------------------------------------------------------------------------------------|-------------------------------------------------------------------------------------|----------------------------------------------------------------------------------|----------------------------------------------------------------------------------|----------------------------------------------------------------------------------|-----------------------------------------------------------------------------------|------------------------------------------------------------------------------------|
|                                                                                     | LF/LCL                                                                              | SF/SCL                                                                              | LF/LCL                                                                               | SF/SCL                                                                                | LF/LCL                                                                              | SF/SCL                                                                              | LF/LCL                                                                              | SF/SCL                                                                               |                                                                                       |                                                                                    |                                                                                    |                                                                                    |                                                                                     |                                                                                      |                                                                                   |                                                                                   |                                                                                   |                                                                                    |                                                                                     |                                                                                  |                                                                                  |                                                                                  |                                                                                   |                                                                                    |
|  |  |  |  |  |  |  |  |  |  |  |  |  |  |  |  |  |  |  |  |  |  |  |  |  |
